# Supplementary material for: Anti-fibrotic activity of polyphenol-enriched sugarcane extract in rats via inhibition of p38 and JNK phosphorylation
Source: Royal Society of Chemistry journal article supplement (doi:10.1039/c7fo01617d), 2017-12-21
Supplement: c7fo01617d1.pdf [file c7fo01617d1.pdf]

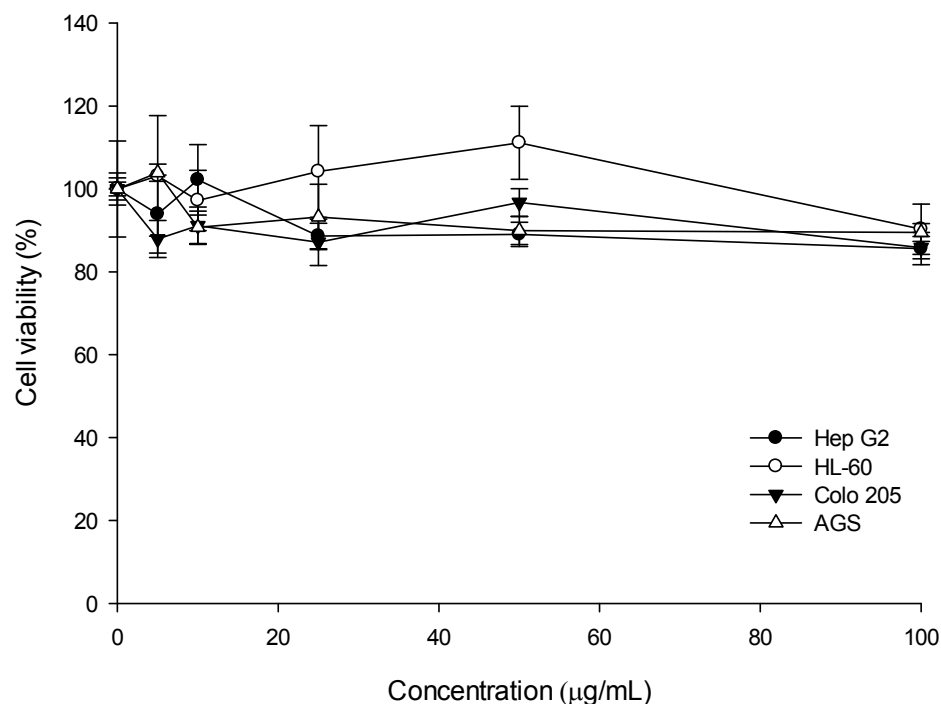

**Supplemental Figure 1.** Human cancer cells (Hep G2, HL-60, COLO205 and AGS) were treated with different concentration of SPPs (0,5, 10, 25, 50 and 100 µg/mL) for 24 hours, and the cancer cells survival were detected by the method of MTT assay.
