# Supplementary material for: Anti-fibrotic activity of polyphenol-enriched sugarcane extract in rats via inhibition of p38 and JNK phosphorylation
Source: Royal Society of Chemistry journal article supplement (doi:10.1039/c7fo01617d), 2017-12-21
Supplement: c7fo01617d3.pdf [file c7fo01617d3.pdf]

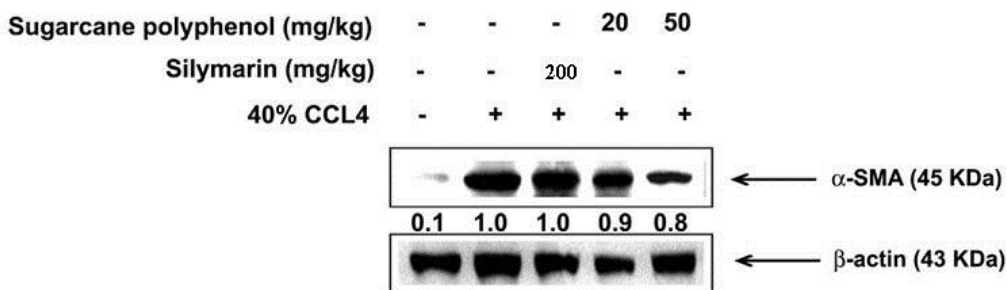

**Supplemental Figure 3.** CCl<sub>4</sub> induced expression of  $\alpha$ -SMA was inhibited by SPE. CCl<sub>4</sub>-induced liver injury rats were fed with different concentrations of SPE. The rat liver was homogenized to study the  $\alpha$ -SMA expression level by western blot analysis
