# Supplementary figures and images for: Anti-fibrotic activity of polyphenol-enriched sugarcane extract in rats via inhibition of p38 and JNK phosphorylation
Source: Royal Society of Chemistry journal article supplement (doi:10.1039/c7fo01617d), 2017-12-21

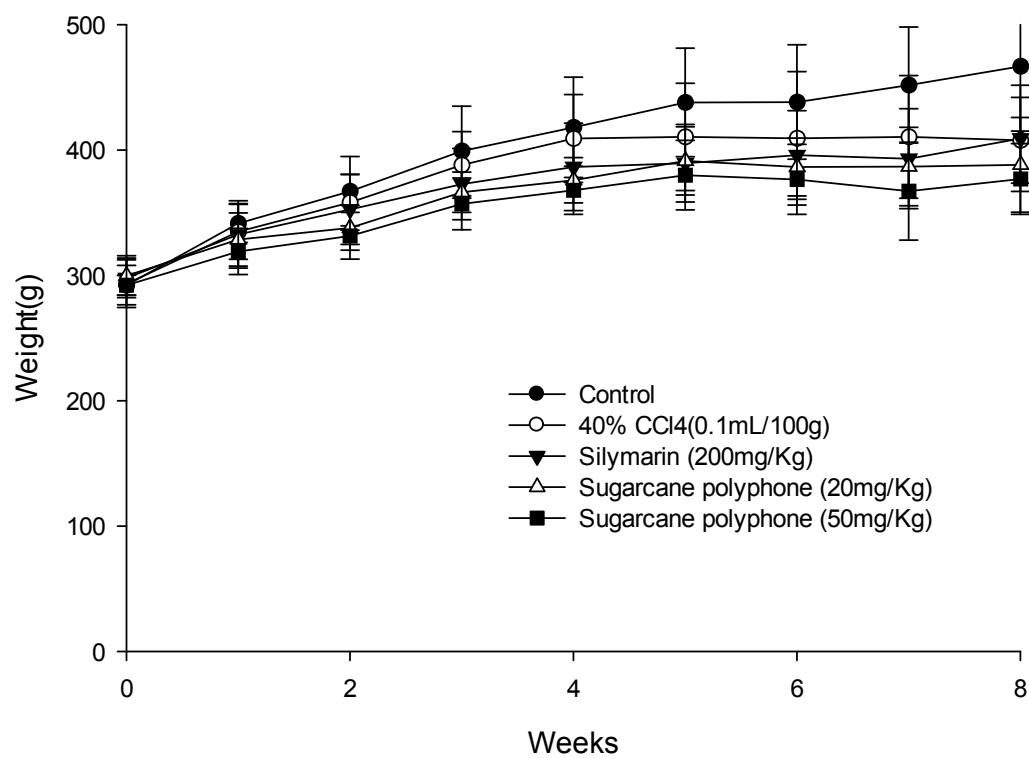

**Supplemental Figure 2.** Body weight changes of each groups under CTC induced liver injury.

Supplement: c7fo01617d2.pdf [file c7fo01617d2.pdf]
